# Supplementary material for: Development and Analytical Validation of a 29 Gene Clinical Pharmacogenetic Genotyping Panel: Multi‐Ethnic Allele and Copy Number Variant Detection
Source: PubMed Central journal article supplement — Clin Transl Sci. 2020 Aug 5;14(1):204–13. doi: 10.1111/cts.12844 (PMC7877843; doi:10.1111/cts.12844), 2020-08-05

# Development and analytical validation of a 29 gene clinical pharmacogenetic genotyping panel: Multi-ethnic allele and copy number variant detection

**Running Title:** Pharmacogenetic genotyping panel validation

Stuart A. Scott<sup>1,2\*</sup>, Erick R. Scott<sup>2</sup>, Yoshinori Seki<sup>1</sup>, Annette J. Chen<sup>1</sup>, Richard Wallsten<sup>1</sup>, Aniwaa Owusu Obeng<sup>2,3</sup>, Mariana R. Botton<sup>1,2,†</sup>, Neal Cody<sup>1,2</sup>, Huanzhi Shi<sup>1</sup>, Geping Zhao<sup>1</sup>, Paul Brake<sup>1</sup>, Paola Nicoletti<sup>1,2</sup>, Yao Yang<sup>1,2,††</sup>, Maria Delio<sup>1</sup>, Lisong Shi<sup>1,2</sup>, Ruth Kornreich<sup>1,2</sup>, Eric E. Schadt<sup>1,2</sup>, and Lisa Edelmann<sup>1,2</sup>

<sup>1</sup> Sema4, Stamford, CT 06902

<sup>2</sup> Department of Genetics and Genomic Sciences, Icahn School of Medicine at Mount Sinai, New York, NY 10029

<sup>3</sup> Institute for Personalized Medicine, Icahn School of Medicine at Mount Sinai, New York, NY 10029

## Current affiliations:

<sup>†</sup> Experimental Research Center, Hospital de Clínicas de Porto Alegre (HCPA), Porto Alegre, Rio Grande do Sul, Brazil; Graduate Program in Genetics and Molecular Biology, Universidade Federal do Rio Grande do Sul (UFRGS), Porto Alegre, Rio Grande do Sul, Brazil.

<sup>††</sup> Department of Pathology and Cell Biology, Columbia University Medical Center, New York, NY 10032.

**Key words:** pharmacogenetics, pharmacogenomics, genetic testing, clinical implementation, genotyping, copy number variation.

**Source of support:** This study was supported by Sema4, Stamford, CT.

**Disclosures:** S.A.S., Y.S., A.J.C., R.W., N.C., H.S., G.Z., P.B., P.N., M.D., L.S., R.K., E.E.S., and L.E. are paid employees of Sema4. All other authors declared no competing interests for this work.

## \* CORRESPONDENCE TO:

### Stuart A. Scott, PhD

Division Head, Pharmacogenomics,  
Sema4, Stamford, CT 06902

Associate Professor, Department of Genetics and Genomic Sciences  
Icahn School of Medicine at Mount Sinai, New York NY 10029

Tel. 646-859-6797

Fax. 212-241-0139

E-mail: stuart.scott@sema4.com

## FIGURE S1.

**FIGURE S1. Multi-ethnic estimation of pharmacogenetic variant allele burden.**

Violin plots are illustrated that simulate the number of pharmacogenetic variants an individual is expected to carry among the 98 sequence variants in the pharmacogenetic panel with available frequency data in both the gnomAD 2.1.1 genomes and 1KG Phase 3 v5a datasets. Allele bootstrap resamples were performed independently across five 1KG superpopulations (n=100, AFR: African; AMR: Ad Mixed American; EAS: East Asian; NFE: Non-Finnish European; SAS: South Asian).

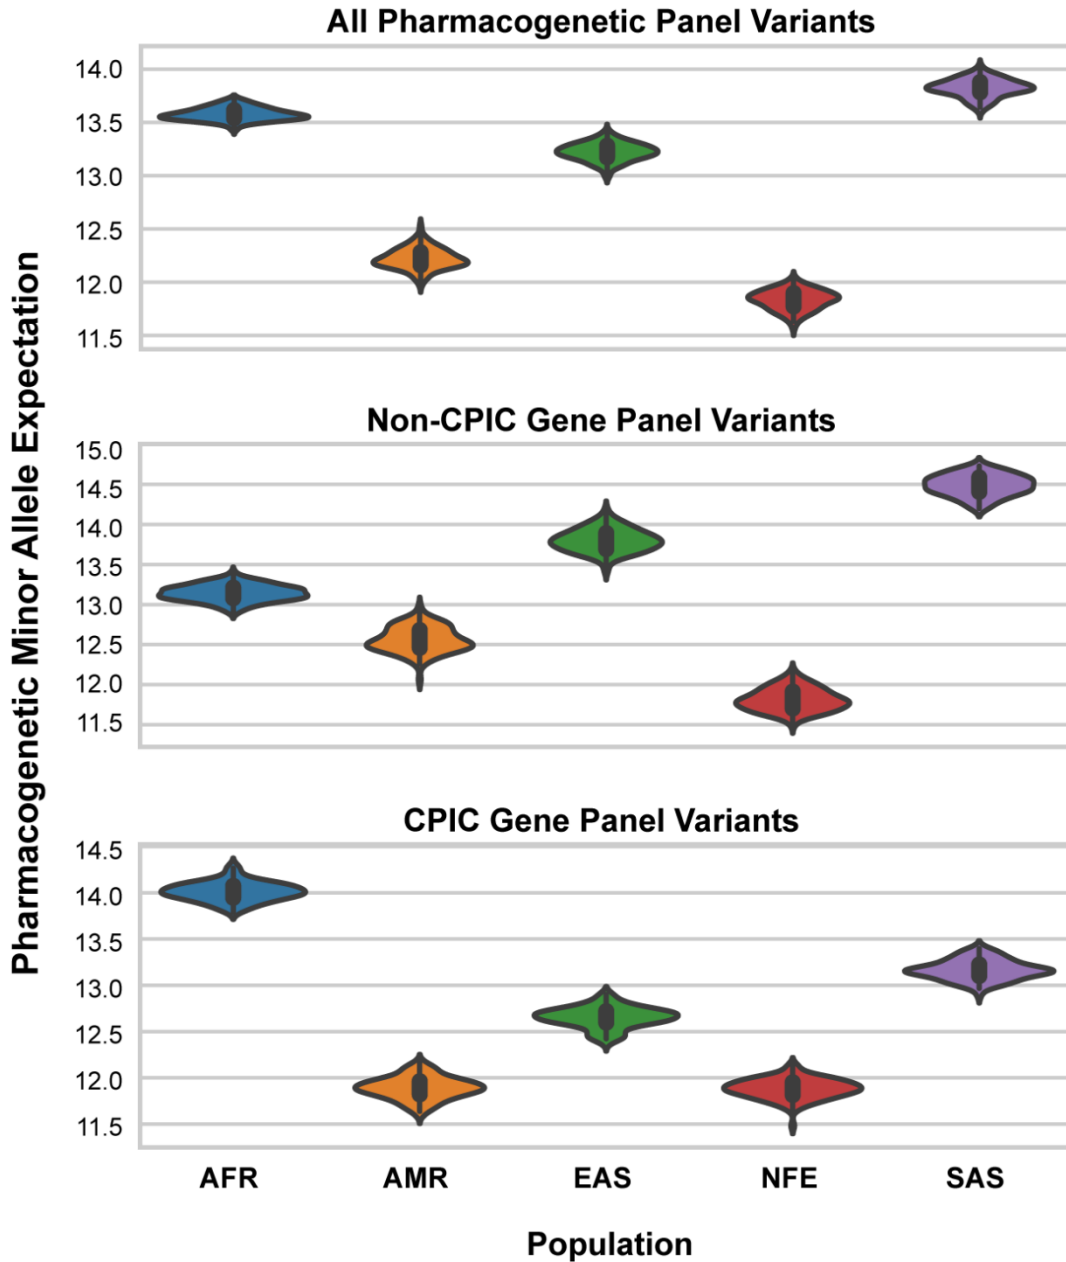

Supplement: CTS-14-204-s002.pdf [file CTS-14-204-s002.pdf]
